# Supplementary material
Source: publisher figshare collection journal article supplement (https://springernature.figshare.com/ndownloader/files/22383234)
Supplement: Supplementary file 1 [file 22383234]

**Additional file 1** for:

The synergistic effect of an imidazolium salt and benzotriazole on the protection of bronze surfaces with chitosan-based coatings

**Debora Kelen Silva da Conceição1, Kauana Nunes de Almeida1, Elsa Nhuch1, Maria Grazia Raucci2, Chiara Santillo2, Martina Salzano de Luna2,3, Luigi Ambrosio2, Marino Lavorgna2, Chiara Giuliani4,Gabriella Di Carlo4, Maria Paola Staccioli4, Tiago Falcade5 and Henri Stephan Schrekker1**

***1) Laboratory of Technological Processes and Catalysis, Institute of Chemistry, Universidade Federal do Rio Grande do Sul (UFRGS), Av. Bento Gonçalves 9500, Porto Alegre, RS, 91501-970, Brazil***

***2) Institute of Polymers, Composites, & Biomaterials, National Research Council (IPCB-CNR), Viale J.F. Kennedy 54, Mostra d'Oltremare, Pad.20, 80125 Naples, Italy***

***3) Institute of Polymers, Composites, & Biomaterials, National Research Council (IPCB-CNR), P.le Fermi 1, 80055 Portici (NA), Italy***

***4) Department of Chemical, Materials and Production Engineering (INSTM Consortium–UdR Naples), University of Naples Federico II, P.le Tecchio 80, 80125 Naples, Italy***

***5) Institute for the Study of Nanostructured Materials, National Research Council (ISMN-CNR), Via Salaria km 29,3 Monterotondo, 00015 Rome, Italy***

***6)*** ***Corrosion Laboratory, Institute of Chemistry, Post-Graduation Program in Mining, Metallurgical and Materials Engineering (PPGE3M), Universidade Federal do Rio Grande do Sul (UFRGS), Av. Bento Gonçalves 9500, Porto Alegre, RS, 91501-970, Brazil***

**Fig.S1** 1H NMR spectrum of **HO2CC1MImCl** (300 MHz, D2O).

**Fig.S2** 13C NMR spectrum of **HO2CC1MImCl** (100 MHz, DMSO-d6).

**Fig.S3** 1H NMR spectrum of **HO2CC1MImNTf2** (300 MHz, D2O).

**Fig.S4** 13C NMR spectrum of **HO2CC1MImNTf2** (100 MHz, DMSO-d6).


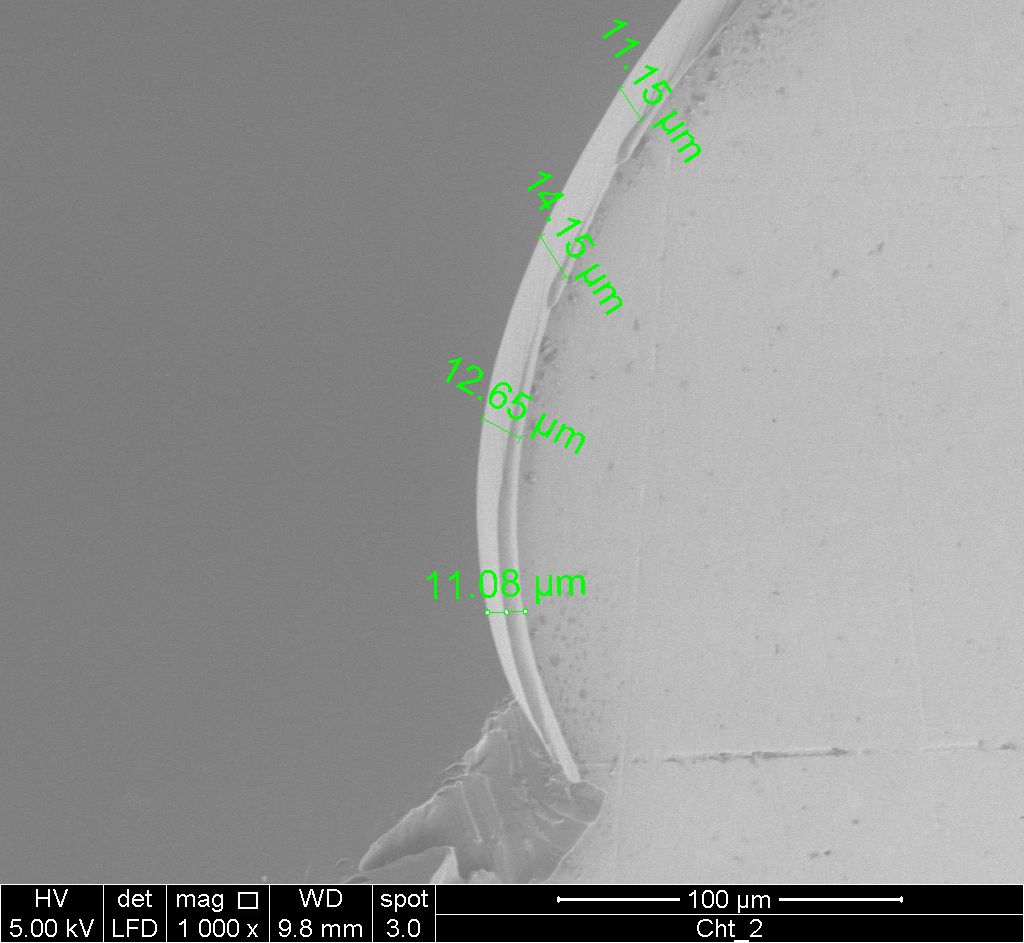

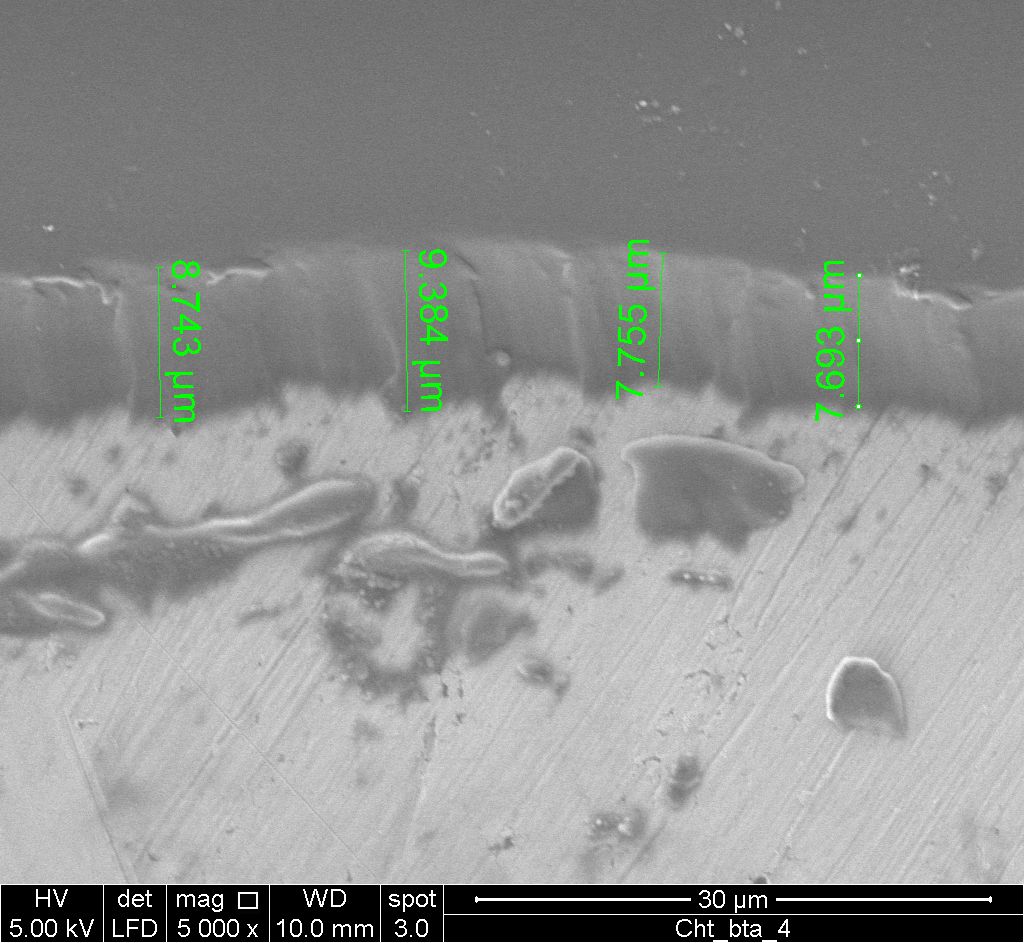


**Fig.S5** Thickness determination by SEM for **CHT** (left image) and **CHT/BTA** (right image).

**Fig.S6** ATR-FTIR spectra of **CHT/BTA** coating on bronze disk before (a) and after 12 h (b) of accelerated corrosion treatment.
